# Supplementary material for: Quercetin spectrofluorometric quantification in aqueous media using different surfactants as fluorescence promoters
Source: PubMed Central journal article supplement — RSC Adv. 2018 Mar 20;8(20):10980–6. doi: 10.1039/c8ra01213j (PMC9079150; doi:10.1039/c8ra01213j), 2018-03-20
Supplement: RA-008-C8RA01213J-s001.pdf [file RA-008-C8RA01213J-s001.pdf]

### Supporting material

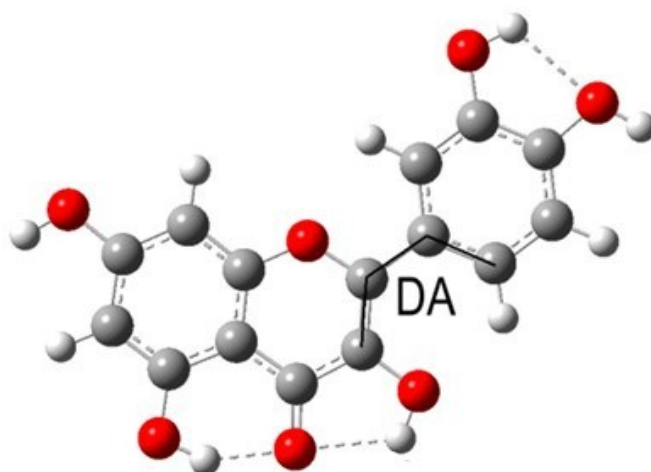

**Figure S1.** Quercetin fully optimized geometry, with a dihedral angle, DA,  $21.63^\circ$ , according with Álvarez-Diduk *et al.* [3], where the colours code is: gray for carbon, red for oxygen and white for hydrogen atoms.

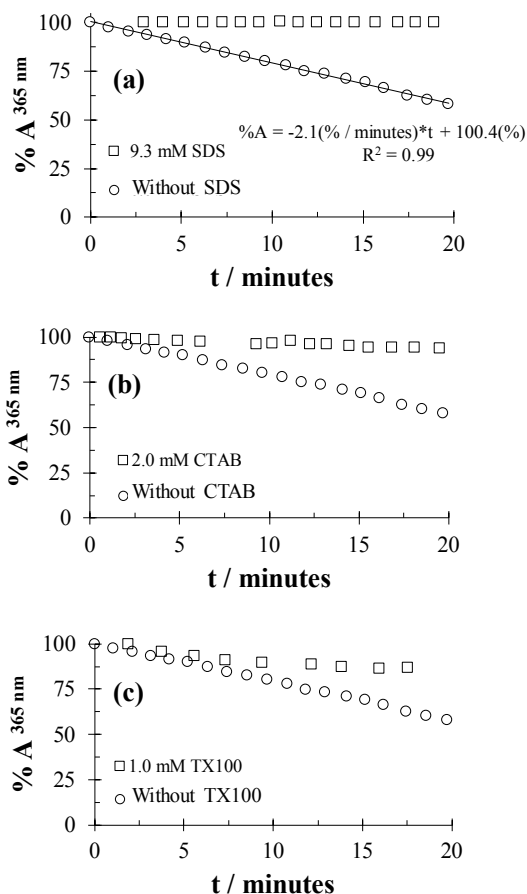

**Figure S2.** Comparison of time variation of the absorbance percentage at 365 nm, referred to its  $t = 0$  value, recorded in a quercetin ( $5 \times 10^{-5}$  M) aqueous solution, ( $28.0 \pm 0.1$ ) °C, and  $\text{pH } 7 \pm 0.2$ , in the absence (circles) and presence (squares) of different surfactants: a) SDS, b) CTAB and c) TX-100, all at a set concentration higher than its respective CMC value. The line was obtained by linear fit of the data in the absence of surfactant molecules.

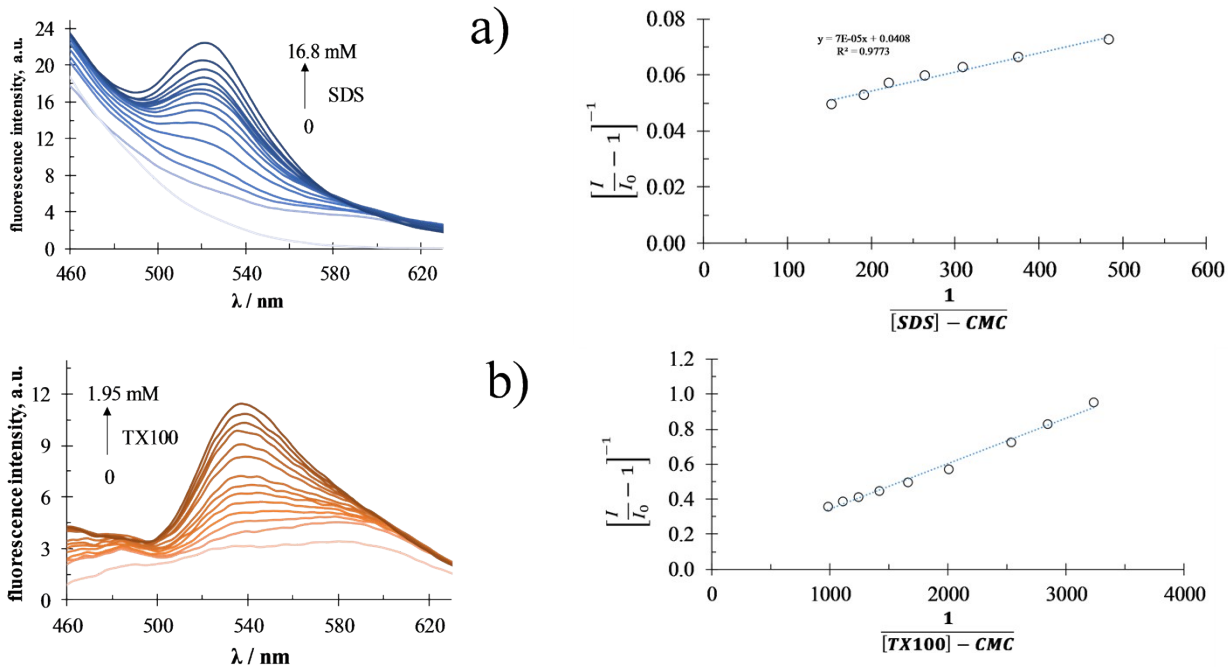

**Figure S3.** Fluorescence emission spectra recorded in a  $6 \times 10^{-5}$  M quercetin aqueous solution containing different SDS (a) or TX100 (b) concentrations, indicated in the figure using 350 nm excitation wavelength at  $(28.0 \pm 0.1)$  °C, pH  $7 \pm 0.2$ . (b) Plot  $[I/I_0 - 1]^{-1}$  vs.  $1/[Surf.] - CMC$  obtained for the fluorescence intensity,  $I$ , in a) and CMC in Table 1.

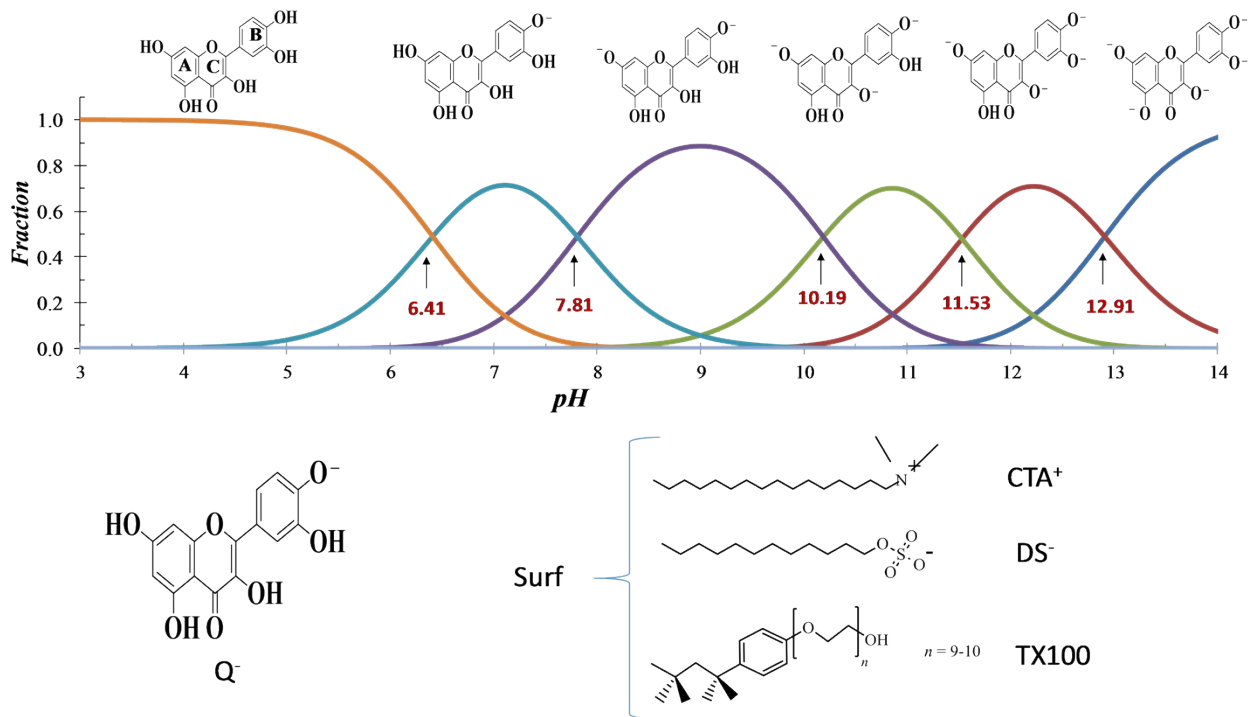

**Figure S4.** Up: Distribution diagram of the quercetin, Q, species as a function of pH constructed from the pKa values reported by Álvarez-Diduk *et al.* [3] Bottom: Quercetin predominant species at pH 7 and the different surfactants considered in this work.

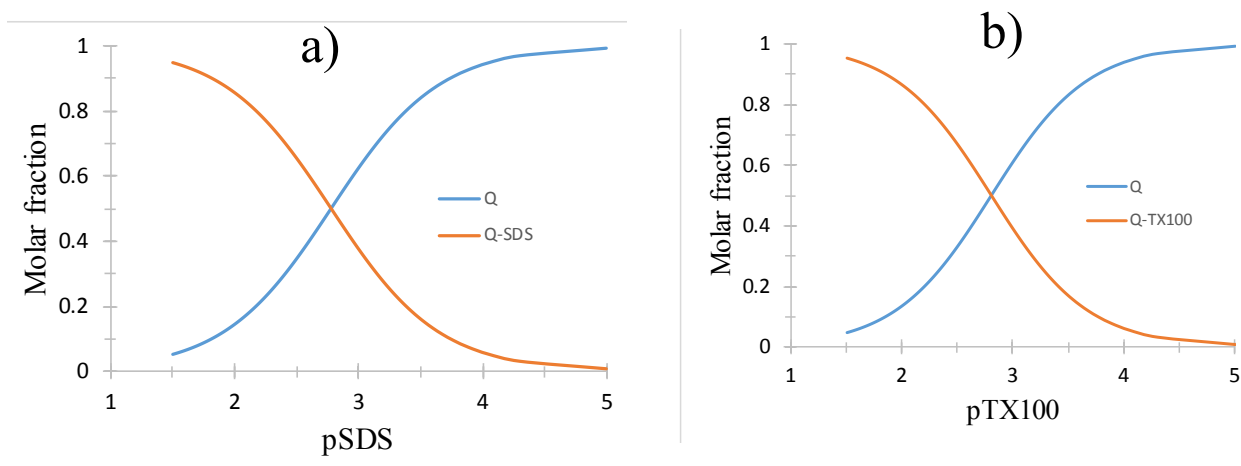

**Figure S5.** Distribution diagram of the quercetin, Q, species as a function of a) pSDS =  $-\log [\text{SDS}]$  or b) pTX100 =  $-\log [\text{TX100}]$ .

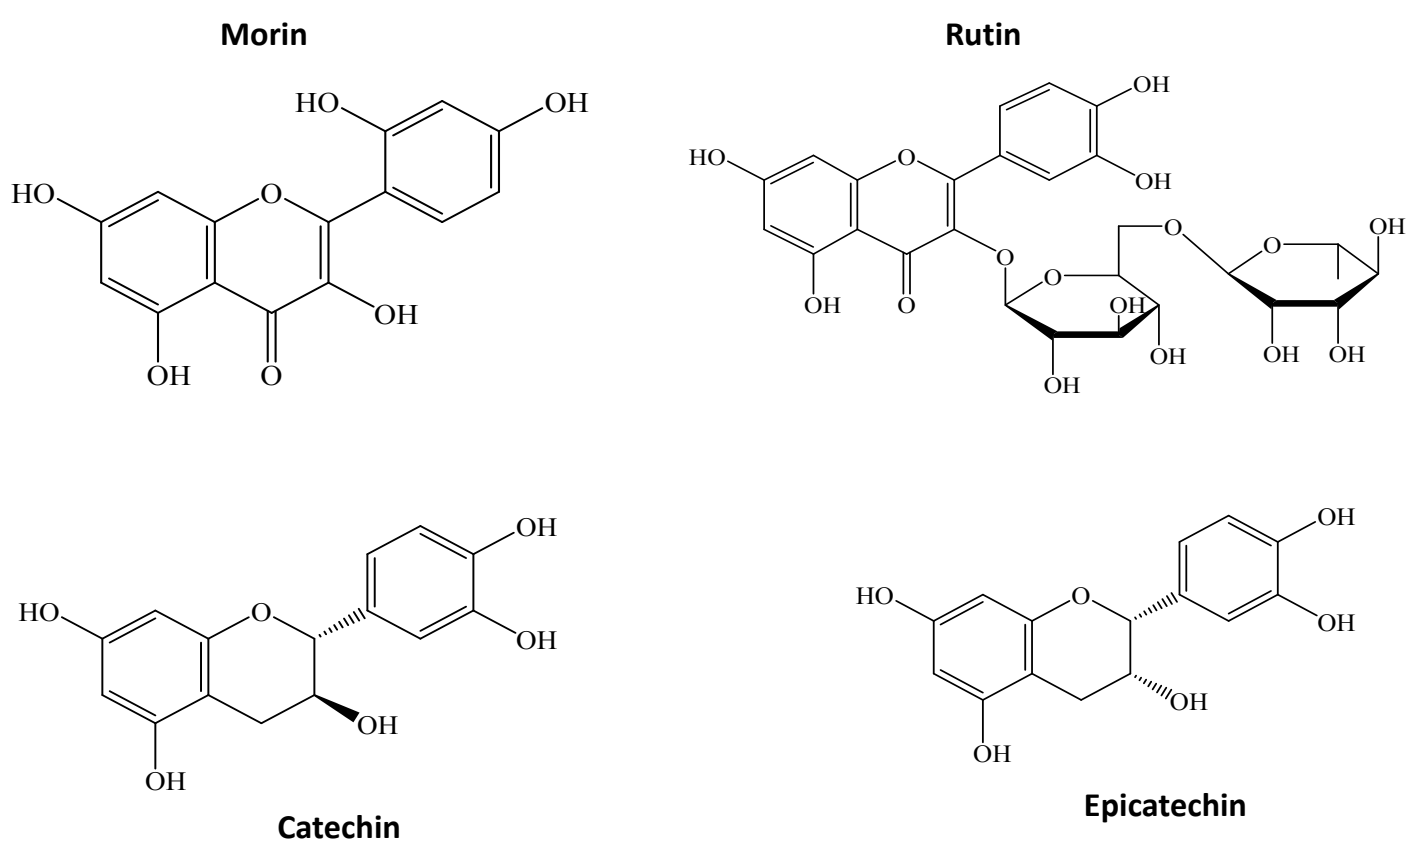

**Figure S6.** Molecules tested as possible interferents during the spectrofluorometric quantification of quercetin.

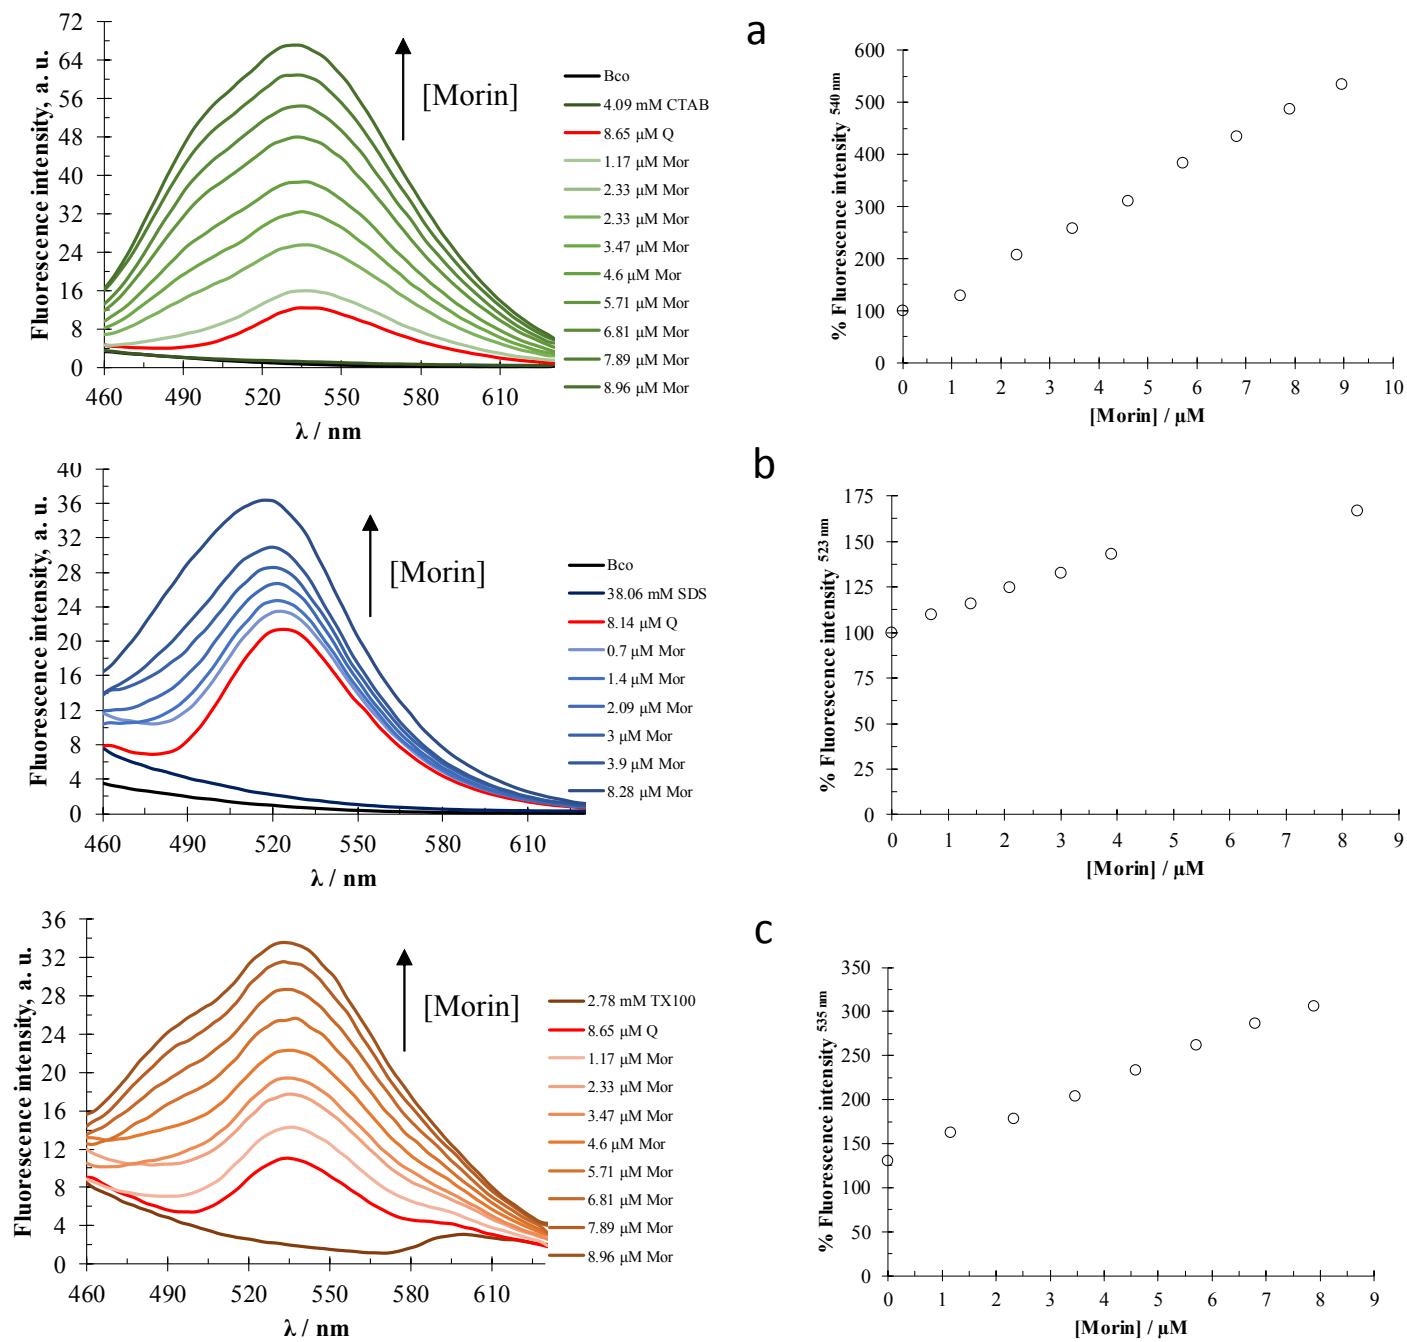

**Figure S7.** Fluorescence emission spectra, using an excitation wavelength of 350 nm, recorded in a) 8.65  $\mu\text{M}$  Q and 4.09 mM CTAB b) 8.14  $\mu\text{M}$  Q and 38.06 mM SDS and c) 8.65  $\mu\text{M}$  Q and 2.78 mM TX-100 aqueous solutions added with different morin concentrations at  $(28.0 \pm 0.1)$   $^{\circ}\text{C}$  and the pH  $7 \pm 0.2$ . The fluorescence intensity variations respect to the value in the absence of morin (%) are also shown at the right of each spectra family.

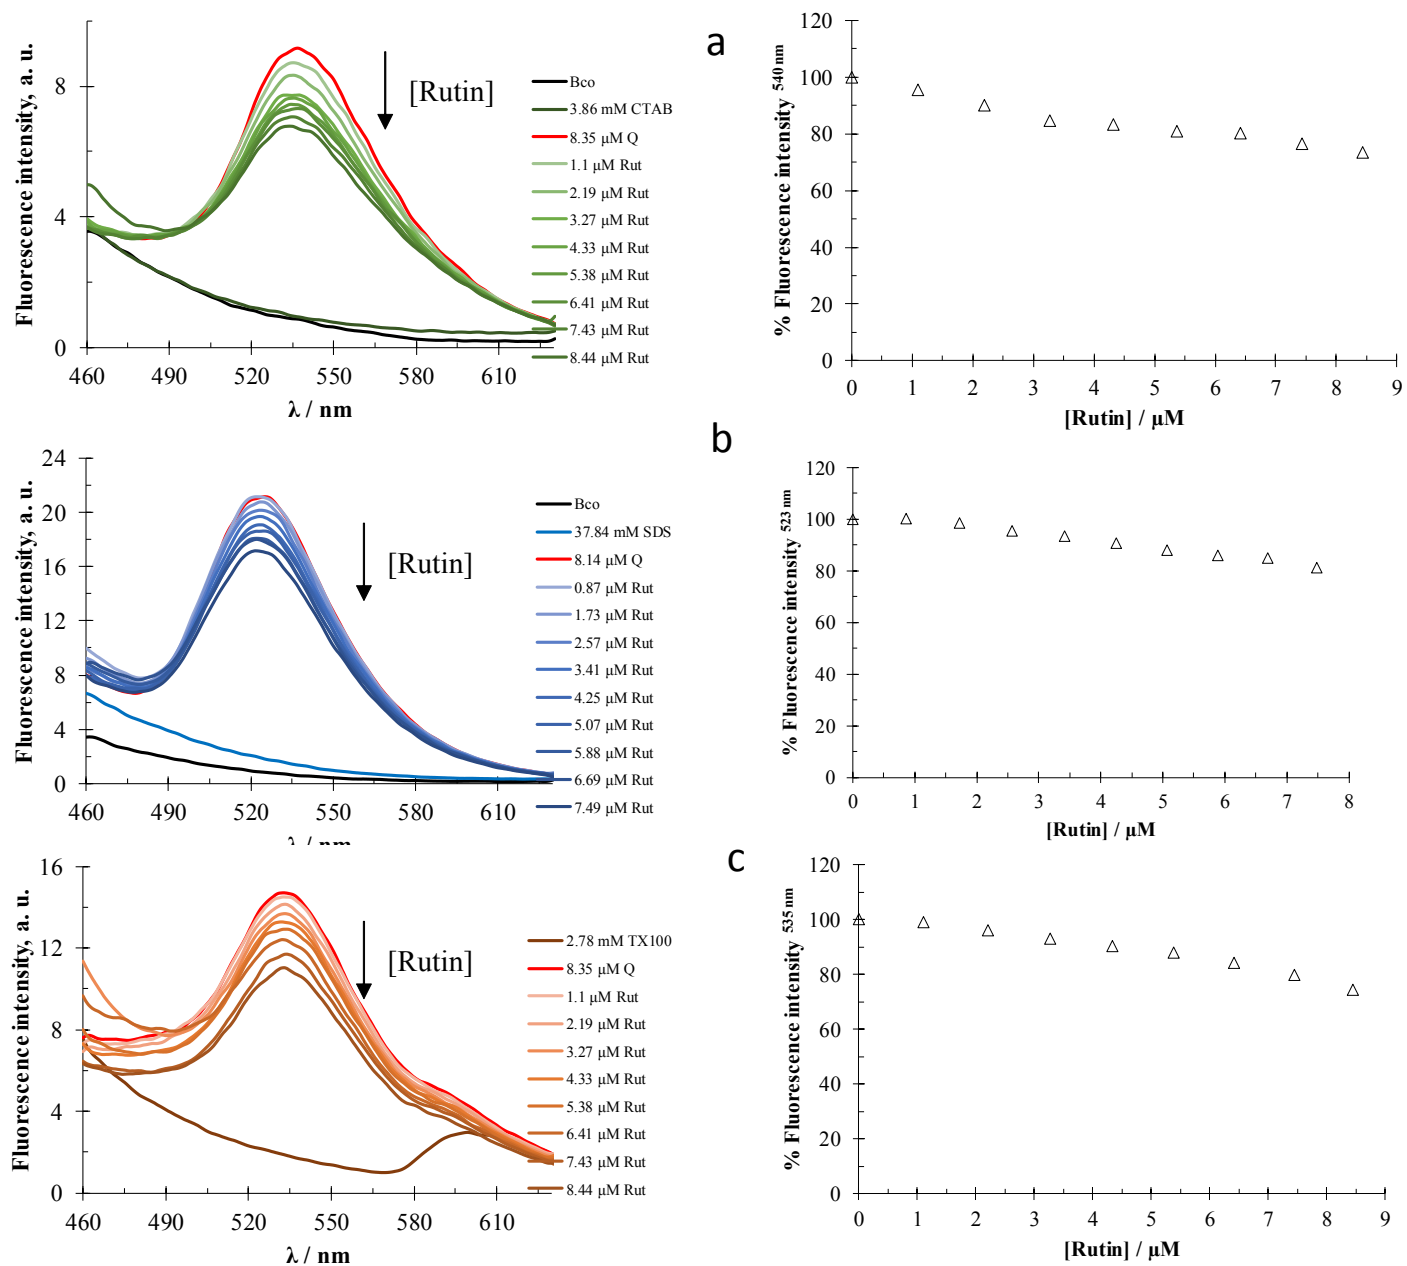

**Figure S8.** Fluorescence emission spectra, using an excitation wavelength of 350 nm, recorded in a) 8.35  $\mu\text{M}$  Q and 3.86 mM CTAB b) 8.14  $\mu\text{M}$  Q and 37.84 mM SDS and c) 8.35  $\mu\text{M}$  Q and 2.78 mM TX-100 aqueous solutions added with different rutin concentrations at  $(28.0 \pm 0.1)^\circ\text{C}$  and the  $\text{pH } 7 \pm 0.2$ . The fluorescence intensity variations respect to the value in the absence of rutin (%) are also shown at the right of each spectra family.

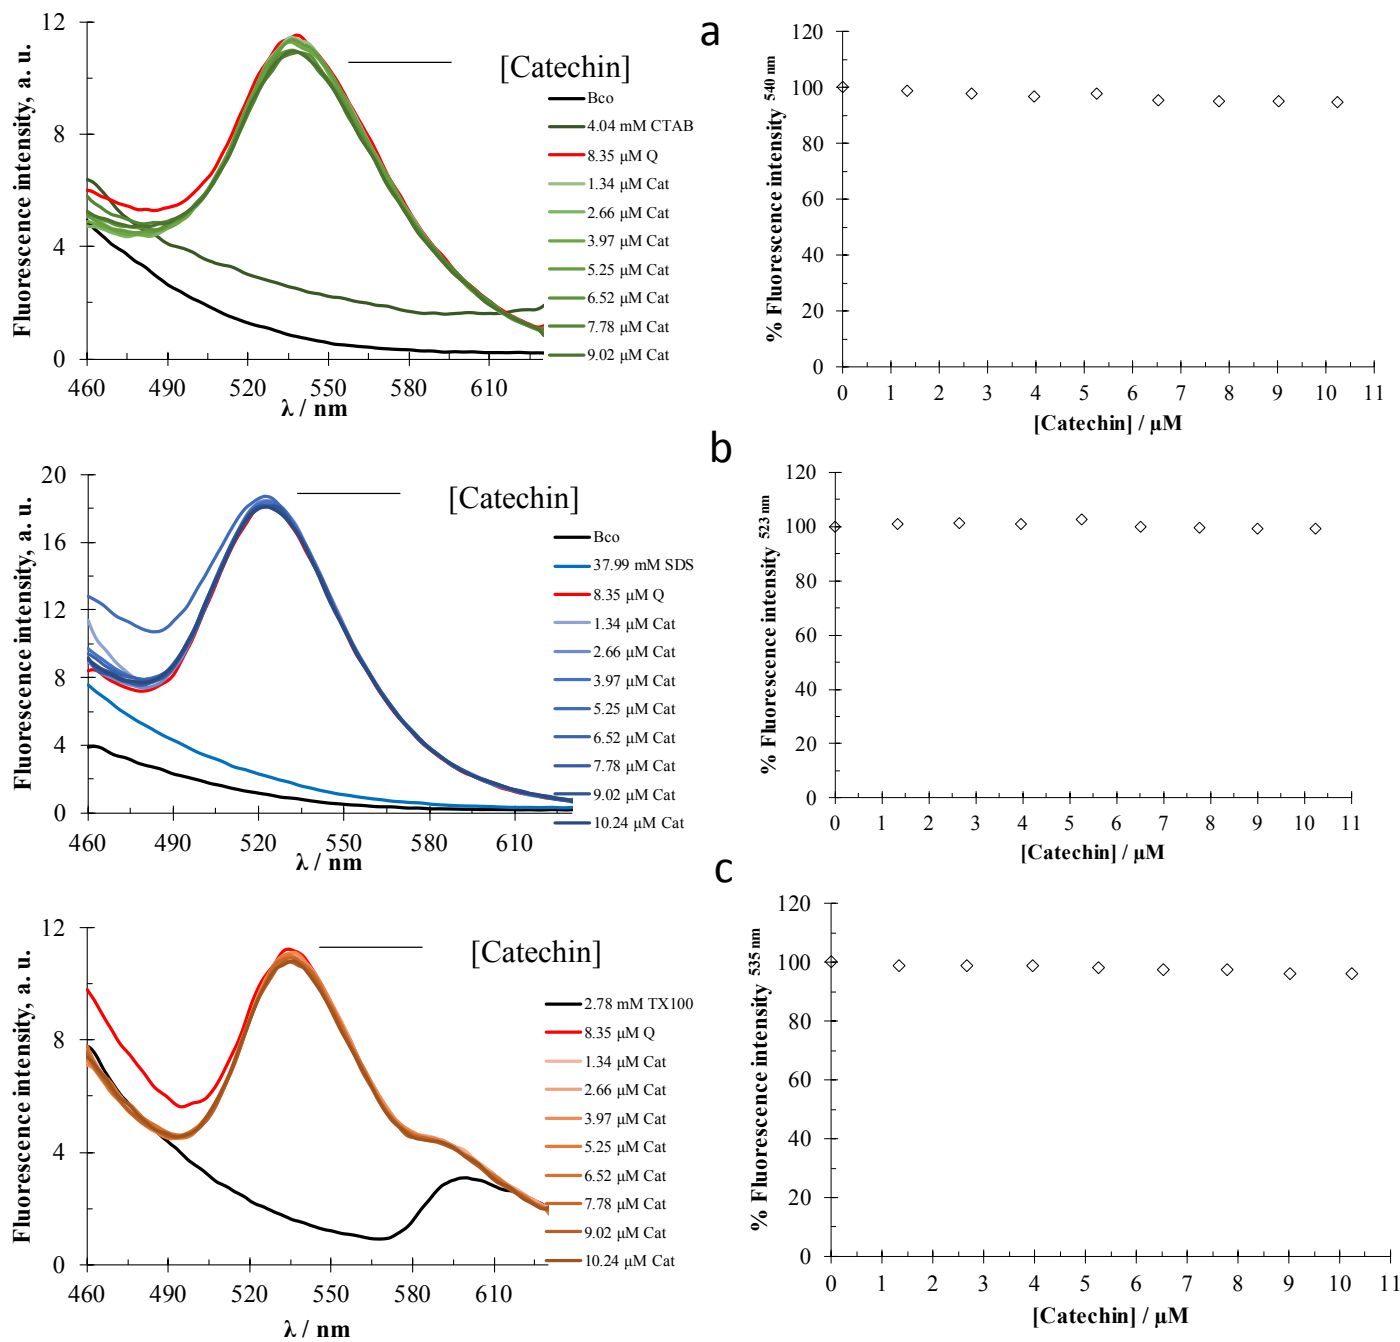

**Figure S9.** Fluorescence emission spectra, using an excitation wavelength of 350 nm, recorded in a) 8.35 μM Q and 4.04 mM CTAB b) 8.35 μM Q and 37.99 mM SDS and c) 8.35 μM Q and 2.78 mM TX-100 aqueous solutions added with different catechin concentrations at  $(28.0 \pm 0.1)^\circ\text{C}$  and the  $\text{pH } 7 \pm 0.2$ . The fluorescence intensity variations respect to the value in the absence of catechin (%) are also shown at the right of each spectra family.

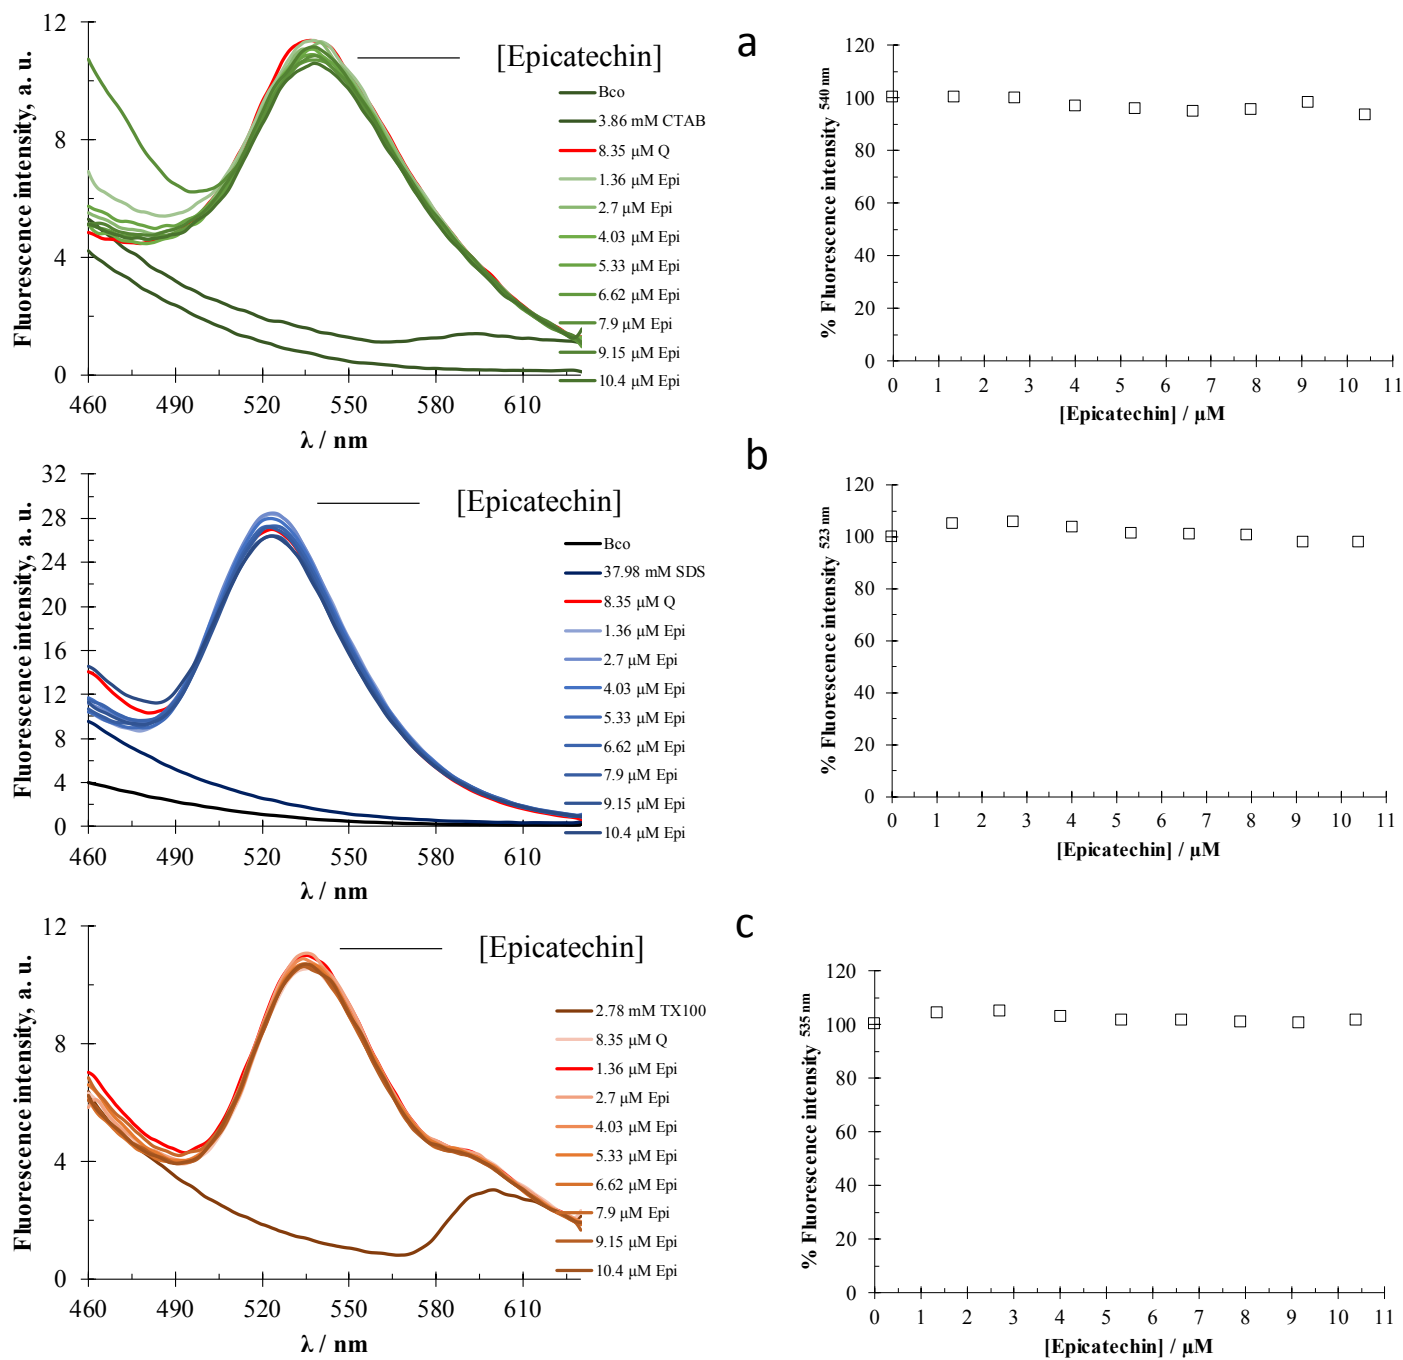

**Figure S10.** Fluorescence emission spectra, using an excitation wavelength of 350 nm, recorded in a) 8.35  $\mu\text{M}$  Q and 3.86 mM CTAB b) 8.35  $\mu\text{M}$  Q and 37.98 mM SDS and c) 8.35  $\mu\text{M}$  Q and 2.78 mM TX-100 aqueous solutions added with different epicathecin concentrations at  $(28.0 \pm 0.1)^\circ\text{C}$  and the  $\text{pH } 7 \pm 0.2$ . The fluorescence intensity variations respect to the value in the absence of Epicatechin (%) are also shown at the right of each spectra family.

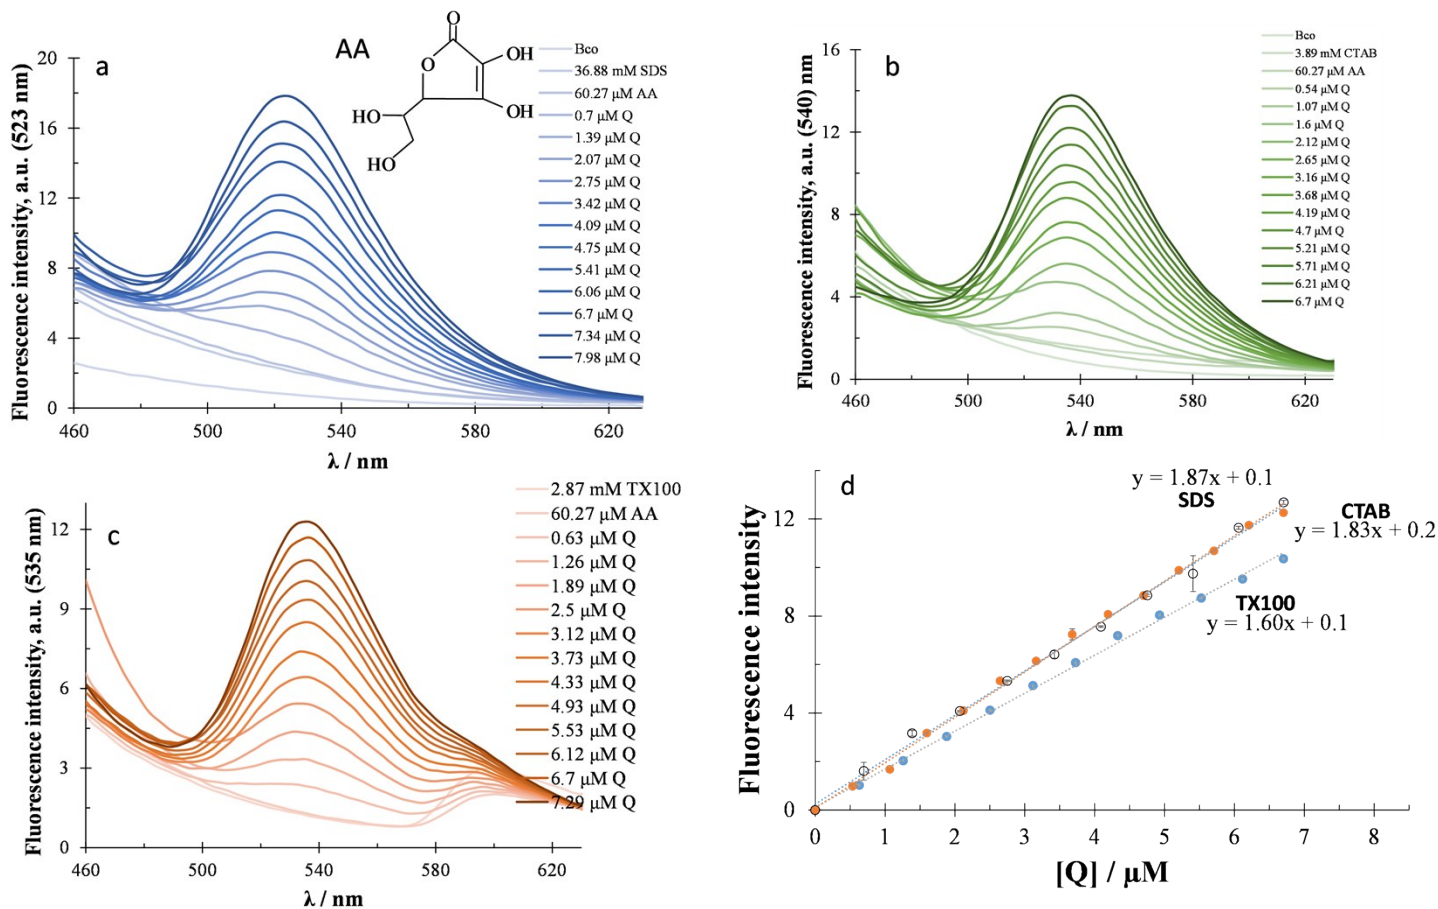

**Figure S11.** Fluorescence emission spectra, using an excitation wavelength of 350 nm, recorded in a) 60.27  $\mu\text{M}$  ascorbic acid (AA) and 36.88 mM SDS b) 60.27  $\mu\text{M}$  AA and 3.89 mM CTAB and c) 60.27  $\mu\text{M}$  AA and 2.78 mM TX-100 aqueous solutions added with different quercetin concentrations at  $(28.0 \pm 0.1)^\circ\text{C}$  and the  $\text{pH } 7 \pm 0.2$ . d) The respective calibration plots are also shown in d). In these plots, the fluorescence intensity of the corresponding AA and surfactant aqueous solution without quercetin was subtracted.
